# Supplementary material for: Facile Preparation of MCM-41/Ag2O Nanomaterials with High Iodide-Removal Efficiency
Source: MDPI journal article supplement (doi:10.3390/nano12203678), 2022-10-20
Supplement: s1 [file s1]

## Supplementary Data

# Facile Preparation of MCM-41/Ag<sub>2</sub>O Nanomaterials with High Iodide-Removal Efficiency

Wenlin Yu <sup>1,2</sup>, Qinpeng Dong <sup>1,2</sup>, Wenbin Yu <sup>2,3,\*</sup>, Quan Wan <sup>2,3,4</sup> and Xiuli Chen <sup>1,\*</sup>

<sup>1</sup> Key Laboratory of Nonferrous Materials and New Processing Technology, Ministry of Education, School of Materials Science and Engineering, Guilin University of Technology, Guilin 541004, China

<sup>2</sup> State Key Laboratory of Ore Deposit Geochemistry, Institute of Geochemistry, Chinese Academy of Sciences, Guiyang 550081, China

<sup>3</sup> University of Chinese Academy of Sciences, Beijing 100049, China

<sup>4</sup> CAS Center for Excellence in Comparative Planetology, Hefei 230026, China

\* Correspondence: yuwenbin@mail.gyig.ac.cn (W.Y.); cxlnwpu@163.com (X.C.)

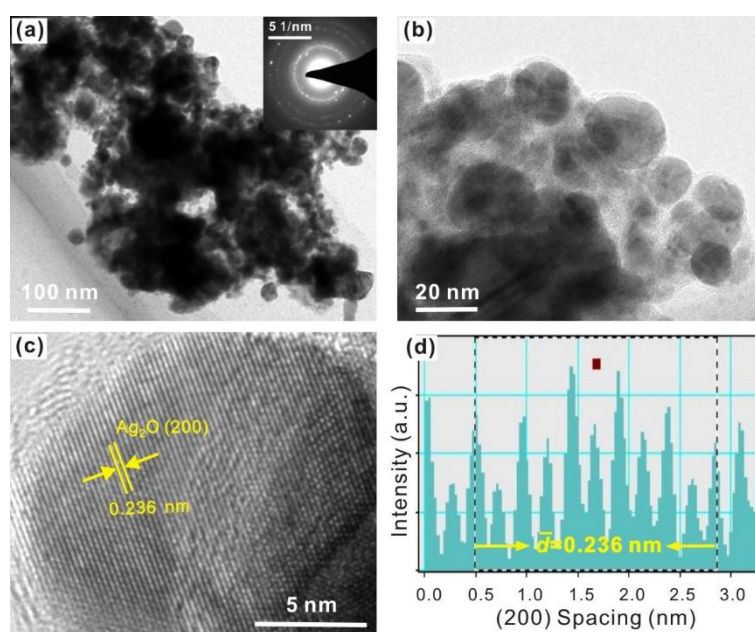

**Figure. S1** (a-b) TEM images of pure Ag<sub>2</sub>O nanoparticles, (c) HR-TEM image of a

Ag<sub>2</sub>O nanoparticles and (d) its integrated pixel intensities.

**Table S1** Kinetics constants for I<sup>-</sup> adsorption on various samples

| Adsorbents                    | Kinetics model and related parameters |                                   |       |                                |                      |       |                                     |                       |       |                                       |                       |       |
|-------------------------------|---------------------------------------|-----------------------------------|-------|--------------------------------|----------------------|-------|-------------------------------------|-----------------------|-------|---------------------------------------|-----------------------|-------|
|                               | Pseudo-second-order model:            |                                   |       | Pseudo-first-order model:      |                      |       | Weber and Morris model:             |                       |       | Simplified Elovich model:             |                       |       |
|                               | $q_t = k_2 q_e^2 t / (1 + k_2 q_e t)$ |                                   |       | $q_t = q_e (1 - \exp(-k_1 t))$ |                      |       | $q_t = k_d t^{1/2} + B$             |                       |       | $q_t = (1/\beta) \ln(\alpha \beta t)$ |                       |       |
|                               | $q_e$                                 | $k_2$ (g·mg <sup>-1</sup>         | $R^2$ | $q_e$                          | $k_1$                | $R^2$ | $k_d$ (mg·g <sup>-1</sup>           | $B$                   | $R^2$ | $\alpha$ (mg·g <sup>-1</sup>          | $\beta$               | $R^2$ |
|                               | (mg·g <sup>-1</sup> )                 | <sup>1</sup> ·min <sup>-1</sup> ) |       | (mg·g <sup>-1</sup> )          | (min <sup>-1</sup> ) |       | <sup>1</sup> ·min <sup>-1/2</sup> ) | (mg·g <sup>-1</sup> ) |       | <sup>1</sup> ·min <sup>-1</sup> )     | (g·mg <sup>-1</sup> ) |       |
| 2-Ag <sub>2</sub> O@MCM-41    | 30.5                                  | 0.005                             | 0.760 | 28.6                           | 0.125                | 0.667 | 0.599                               | 15.98                 | 0.438 | 305.7                                 | 0.35                  | 0.809 |
| 5-Ag <sub>2</sub> O@MCM-41    | 81.4                                  | 0.060                             | 0.961 | 80.8                           | 1.024                | 0.959 | 0.889                               | 61.79                 | 0.102 | 1.3E26                                | 0.80                  | 0.969 |
| 12.5-Ag <sub>2</sub> O@MCM-41 | 134.6                                 | 0.0038                            | 0.996 | 130.7                          | 0.250                | 0.974 | 1.730                               | 91.85                 | 0.203 | 3.5E8                                 | 0.18                  | 0.977 |

**Table S2.** Comparison of adsorption capacities of different adsorbents for I<sup>-</sup>.

| Adsorbents                    | I <sup>-</sup> adsorption capacities | Ref.      |
|-------------------------------|--------------------------------------|-----------|
| 2-Ag <sub>2</sub> O@MCM-41    | 31.1 mg/g                            | This work |
| 5-Ag <sub>2</sub> O@MCM-41    | 83.2 mg/g                            | This work |
| 12.5-Ag <sub>2</sub> O@MCM-41 | 134.6 mg/g                           | This work |
| Black carbon                  | ~2 mg/g                              | [1]       |
| Activated Carbon              | ~12.7 mg/g                           | [2]       |
| Chrysotile bundles            | 4.13 mg/g                            | [3]       |
| Ferrihydrite                  | < 0.127 mg/g                         | [4]       |
| Mg/Al LDH                     | 5.8 mg/g                             | [5]       |
| Halloysite/Ag <sub>2</sub> O  | 57.7 mg/g                            | [6]       |
| Cuprite (Cu <sub>2</sub> O)   | ~0.15 mg/g                           | [7]       |

## References

1. Choung, S.; Um, W.; Kim, M.; Kim, M.G. Uptake Mechanism for Iodine Species to Black Carbon. *Environmental Science & Technology* **2013**, *47*, 10349-10355, doi:10.1021/es401570a.
2. Hoskins, J.S.; Karanfil, T.; Serkiz, S.M. Removal and Sequestration of Iodide Using Silver-Impregnated Activated Carbon. *Environmental Science & Technology* **2002**, *36*, 784-789, doi:10.1021/es010972m.
3. Yu, W.; Xu, H.; Roden, E.E.; Wan, Q. Efficient adsorption of iodide from water by chrysotile bundles with wedge-shaped nanopores. *Applied Clay Science* **2019**, *183*, 105331, <https://doi.org/10.1016/j.clay.2019.105331>.
4. Yu, Z.; Warner, J.A.; Dahlgren, R.A.; Casey, W.H. Reactivity of iodide in volcanic soils and noncrystalline soil constituents. *Geochim. Cosmochim. Acta* **1996**, *60*, 4945-4956, [https://doi.org/10.1016/S0016-7037\(96\)00305-5](https://doi.org/10.1016/S0016-7037(96)00305-5).
5. Liang, L.; Li, L. Adsorption behavior of calcined layered double hydroxides towards removal of iodide contaminants. *J. Radioanal. Nucl. Chem.* **2007**, *273*, 221-226, doi:10.1007/s10967-007-0740-x.
6. Yu, W.; Dong, Q.; Yu, W.; Qin, Z.; Nie, X.; Wan, Q.; Chen, X. Preparation of Halloysite/Ag<sub>2</sub>O Nanomaterials and Their Performance for Iodide Adsorption. *Minerals* **2022**, *12*, doi:10.3390/min12030304.
7. Lefèvre, G.; Walcarius, A.; Ehrhardt, J.J.; Bessière, J. Sorption of Iodide on Cuprite (Cu<sub>2</sub>O). *Langmuir* **2000**, *16*, 4519-4527, doi:10.1021/la9903999.
